# Supplementary material for: Pure exciplex-based white organic light-emitting diodes with imitation daylight emissions
Source: Royal Society of Chemistry journal article supplement (doi:10.1039/c8ra04986f), 2018-01-01
Supplement: c8ra04986f1.pdf [file c8ra04986f1.pdf]

## Supporting Information

### Pure exciplex-based white organic light-emitting diodes with imitation daylight emissions

Dian Luo,<sup>a</sup> Chung-Tsung Hsieh,<sup>a</sup> Yen-Po Wang,<sup>a</sup> Thomas C. Chuang,<sup>b</sup> Hsin-Hua Chang<sup>c</sup> and Chih-Hao Chang<sup>\*a</sup>

**Table S1** The CIE coordinates, correlated color temperatures (CCT), and color rendering index (CRI) of devices A and B1

| Voltage (V) | Device A                       |                        |         |       | Device B1                      |                        |         |       |
|-------------|--------------------------------|------------------------|---------|-------|--------------------------------|------------------------|---------|-------|
|             | Luminance (cd/m <sup>2</sup> ) | CIE coordinates (x, y) | CCT (K) | CRI   | Luminance (cd/m <sup>2</sup> ) | CIE coordinates (x, y) | CCT (K) | CRI   |
| 6           | 4.46                           | 0.517, 0.435           | 2219    | 68.42 | 1.75                           | 0.497, 0.427           | 2364    | 74.43 |
| 7           | 9.71                           | 0.511, 0.430           | 2236    | 68.69 | 5.41                           | 0.456, 0.404           | 2692    | 78.96 |
| 8           | 17.65                          | 0.505, 0.425           | 2269    | 68.16 | 15.12                          | 0.418, 0.376           | 3100    | 83.99 |
| 9           | 29.92                          | 0.501, 0.420           | 2264    | 69.76 | 36.37                          | 0.383, 0.346           | 3626    | 89.25 |
| 10          | 47.98                          | 0.491, 0.411           | 2322    | 70.75 | 79.98                          | 0.353, 0.319           | 4489    | 93.35 |
| 11          | 74.32                          | 0.477, 0.396           | 2364    | 71.89 | 168.75                         | 0.329, 0.296           | 5671    | 91.44 |
| 12          | 113.01                         | 0.460, 0.378           | 2428    | 73.69 | 302.37                         | 0.310, 0.280           | 7311    | 88.73 |
| 13          | 176.32                         | 0.440, 0.357           | 2541    | 76.76 | 493.91                         | 0.296, 0.268           | 9241    | 86.76 |
| 14          | 301.99                         | 0.425, 0.343           | 3647    | 80.21 | 720.34                         | 0.290, 0.265           | 10376   | 87.00 |
| 15          | 543.72                         | 0.417, 0.337           | 2705    | 82.56 | 914.57                         | 0.285, 0.266           | 10898   | 87.67 |

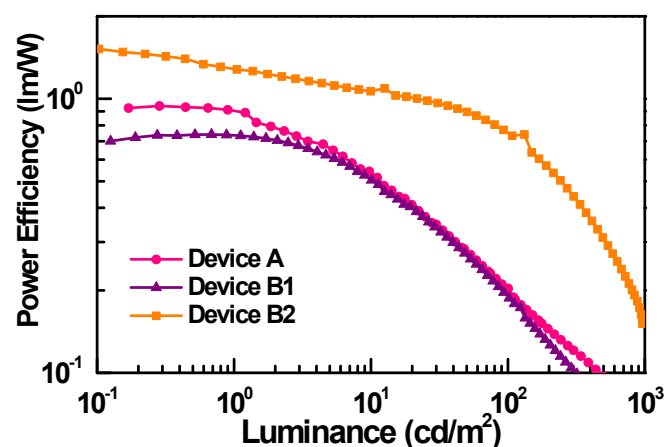

**Fig. S1** Power efficiency vs. luminance of devices A, B1, and B2.
